# Supplementary material
Source: PubMed Central journal article supplement (PMC6460636)

# Figure S1

Western blots of HEK293 cells untransduced ( $t^0$ ) or transduced with wild type PDGFR ( $t^{wt}$ ) or mutant PDGFR ( $t^{N666S}$ ), untreated or treated with 0.1  $\mu$ M imatinib, and blotted to detect phosphorylated PLC $\gamma$ 1 (P-PLC $\gamma$ 1) and total PLC $\gamma$ 1 (PLC $\gamma$ 1), phosphorylated STAT1 (P-STAT1) and total STAT1 (STAT1), phosphorylated-Tyr542- PTPN11 (P-PTPN11<sup>Y542</sup>), phosphorylated-Tyr580- PTPN11 (P-PTPN11<sup>Y580</sup>) and total PTPN11 (PTPN11), phosphorylated MAPK3 (P-MAPK3) and total MAPK3 (MAPK3).

The amount of GAPDH (lines marked with \*) was measured as a protein loading control.

Molecular sizes are indicated in kDa)

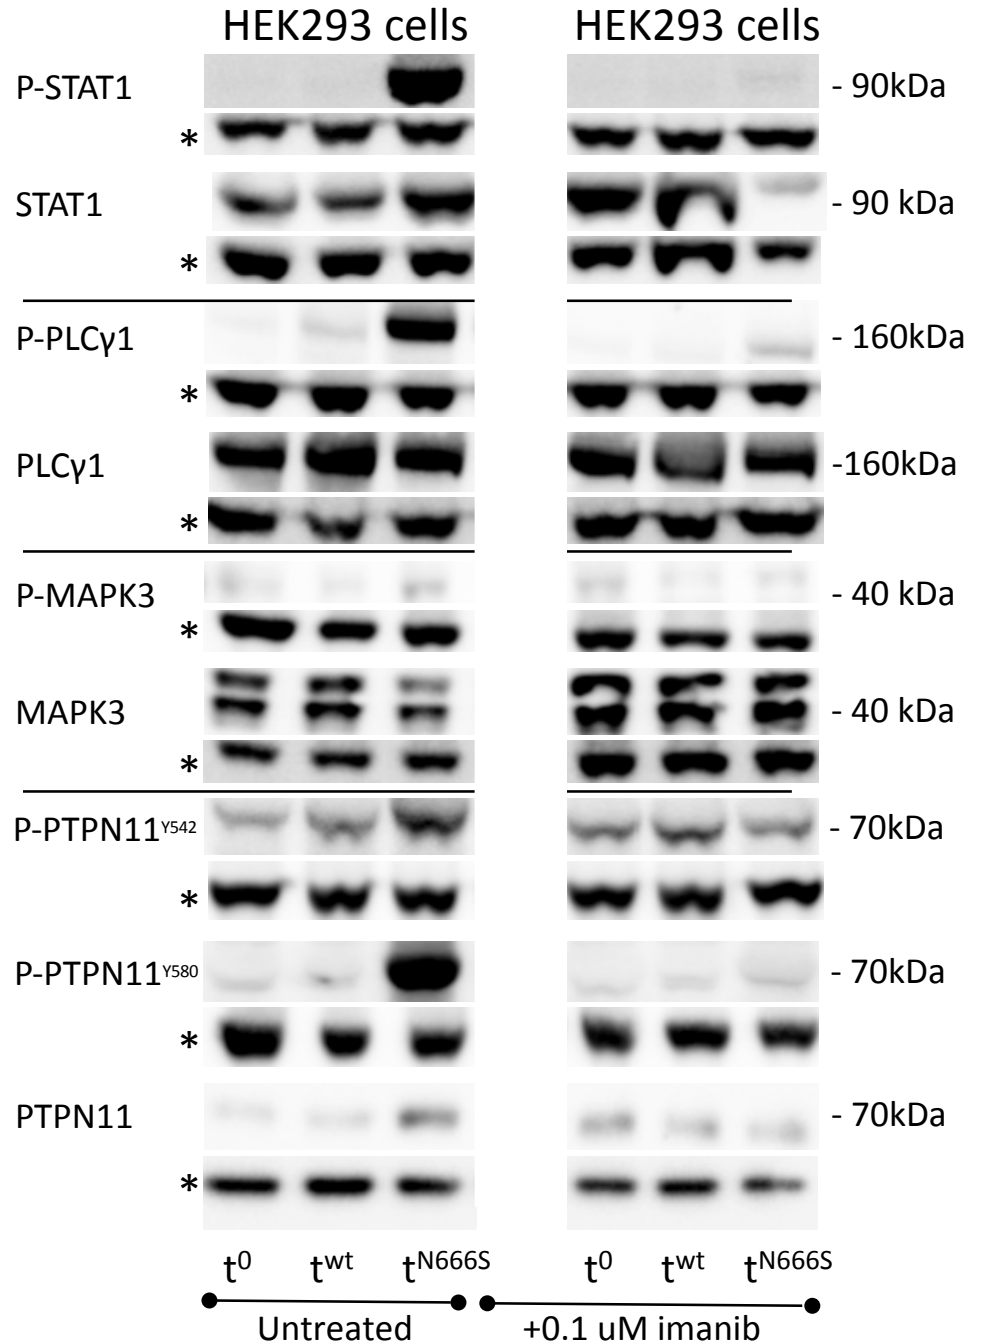

Supplement: 41431_2018_323_MOESM1_ESM.pdf [file 41431_2018_323_MOESM1_ESM.pdf]
