# Supplementary material
Source: PubMed Central journal article supplement (PMC6460636)

**Figure S2:** Pictures of patient and control skin fibroblast cultures after the second and third culture passage. Patient cells were more prone to undergo apoptosis (notice e.g. more cell blebbing on the right-hand pictures).

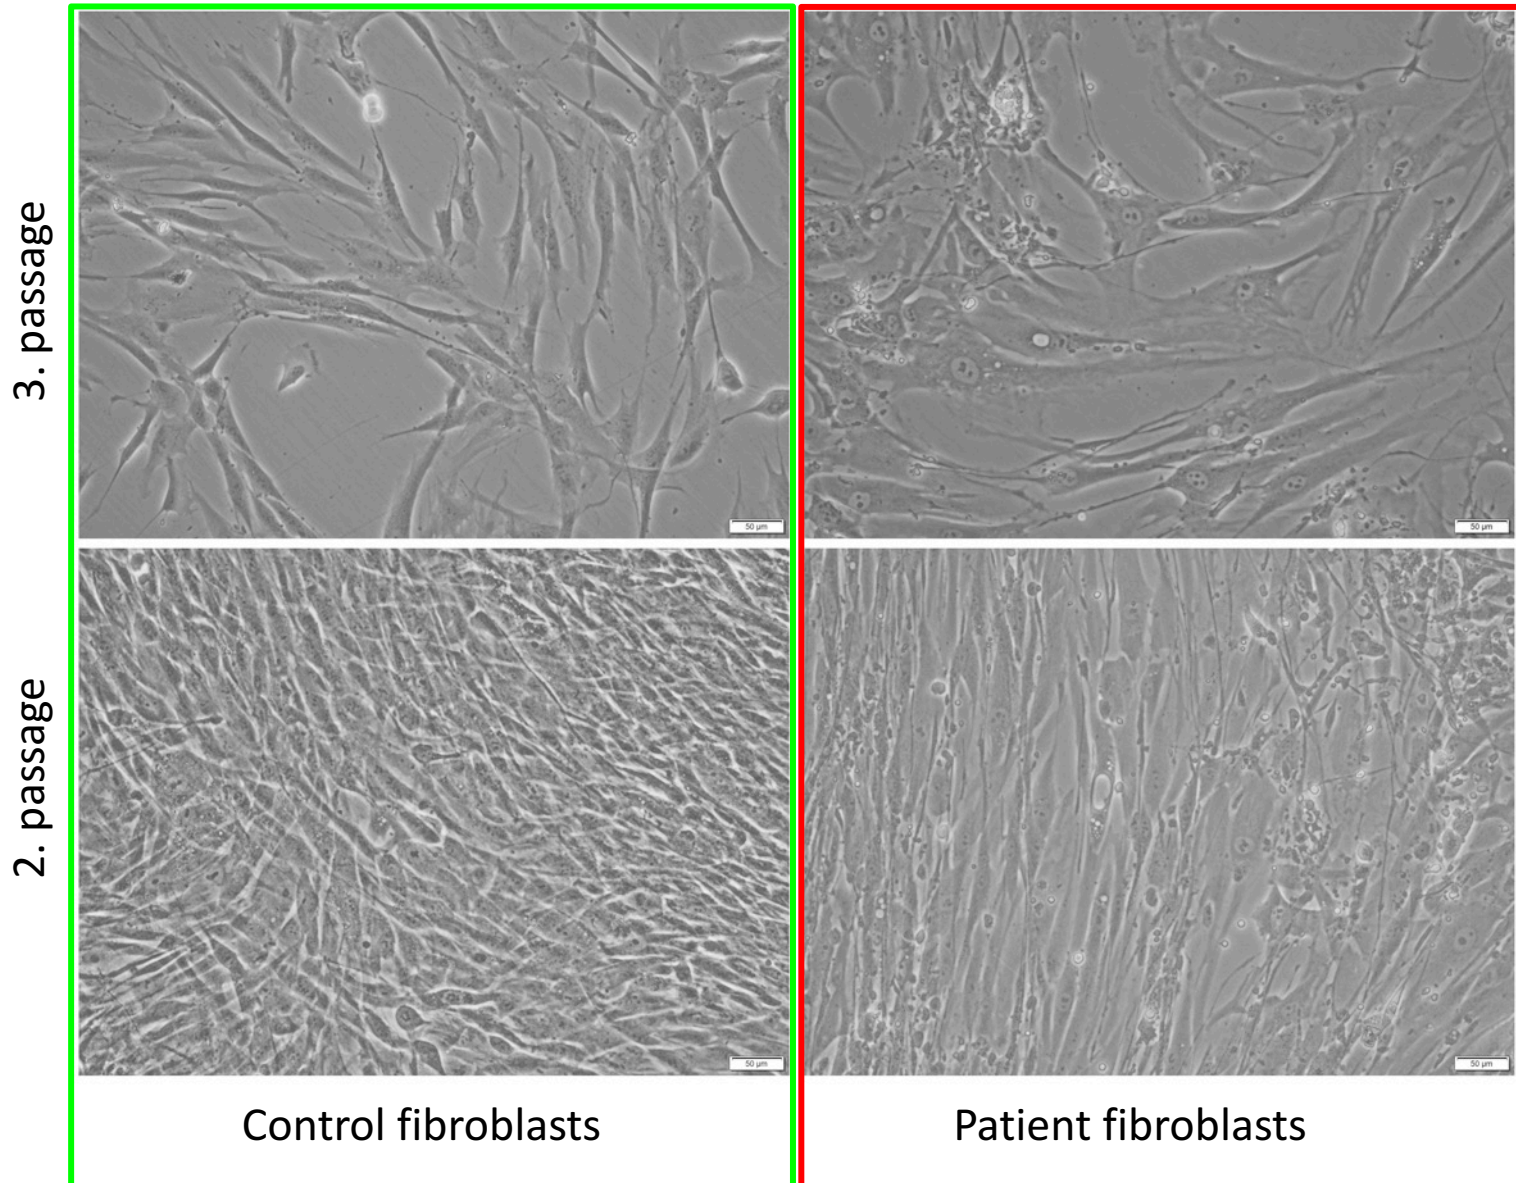

Supplement: 41431_2018_323_MOESM2_ESM.pdf [file 41431_2018_323_MOESM2_ESM.pdf]
