# Supplementary material
Source: PubMed Central journal article supplement (PMC6460636)

**Figure S3:** Flowcytometric apoptosis assay. Note relatively more cells in the Q3 (early apoptosis) and Q2 (late apoptosis) fractions in the patient fibroblasts cell culture suspensions.

Skin biopsy fibroblast culture from a normal individual

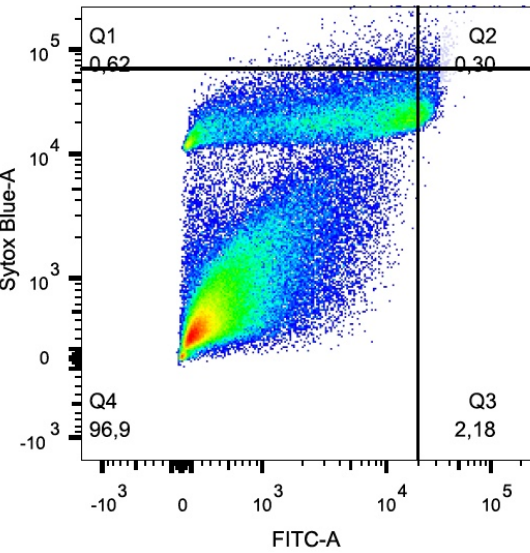

Skin biopsy fibroblast culture from the Norwegian patient

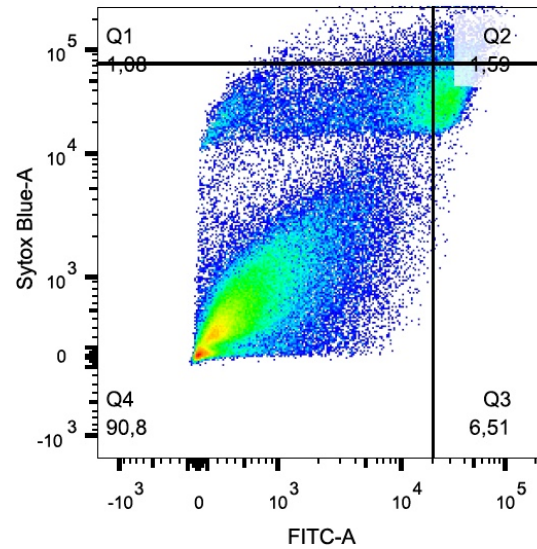

Skin biopsy fibroblast culture from the Australian patient

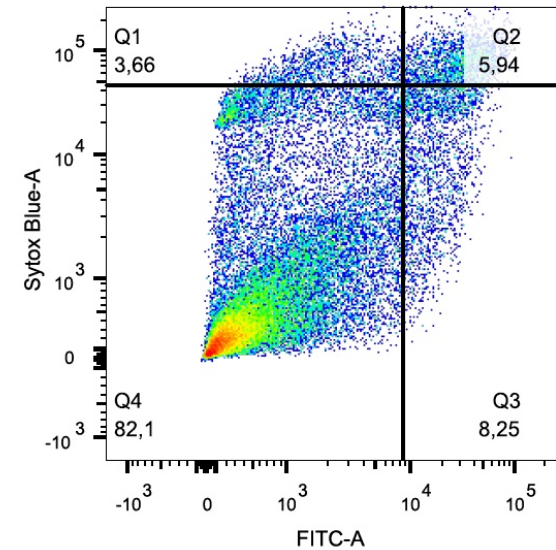

Supplement: 41431_2018_323_MOESM3_ESM.pdf [file 41431_2018_323_MOESM3_ESM.pdf]
